# Supplementary material
Source: Springer Nature journal article supplement (https://www.springermedizin.de/resource/supplementary/12961_2012_251_MOESM1_ESM.pdf/9570874)
Supplement: MOESM1 [file 9570874]

## Individual

Perceived pros  
and cons

Personal  
expectations

## Organisational

Structures and  
procedures

Degree of  
equivalency

## Contextual

Health System's  
composition

Political  
environment

Resource  
framework

**Key  
influences**

**Establishing**

**Supporting &  
adjusting**

**Dissolving**

**Partnership  
Process**

### *Changes/implications*

- Synergy of approaches
- Generation of new knowledge
- Transformation of policy/practice

### *Characteristics*

- Timeframe (outputs, outcomes, impact)
- Nature of effects (intended/unintended)

**Effects of  
Partnership**
